# Supplementary material for: Ratiometric fluorescent detection of dipicolinic acid as an anthrax biomarker based on a high-nuclearity Yb18 nanoring
Source: Royal Society of Chemistry journal article supplement (doi:10.1039/d1dt01731d), 2021-01-01
Supplement: d1dt01731d1.pdf [file d1dt01731d1.pdf]

## Supporting Information

# **Ratiometric fluorescent detection of dipicolinic acid as an anthrax biomarker based on a high-nuclearity Yb<sub>18</sub> nanoring**

**Yanan Ma, Xiaoping Yang,\* Wenxin Hao, Ting Zhu, Chengri Wang, and Desmond Schipper**

## **Contents**

|                                                                                                         |     |
|---------------------------------------------------------------------------------------------------------|-----|
| 1. General Procedures.....                                                                              | S2  |
| 2. Synthesis of the ligand H <sub>4</sub> L <sup>1</sup> .....                                          | S2  |
| 3. <sup>1</sup> H NMR and <sup>13</sup> C NMR spectra of the ligand H <sub>4</sub> L <sup>1</sup> ..... | S3  |
| 4. IR spectra of the ligand H <sub>4</sub> L <sup>1</sup> and <b>1</b> .....                            | S4  |
| 5. The thermogravimetric analysis of <b>1</b> .....                                                     | S4  |
| 6. Powder XRD pattern of <b>1</b> .....                                                                 | S5  |
| 7. UV-vis absorption spectra of the ligand H <sub>4</sub> L <sup>1</sup> and <b>1</b> .....             | S5  |
| 8. The emission spectrum of the Gd(III) analogue at 77 K.....                                           | S6  |
| 9. The fluorescent response of <b>1</b> to DPA and interferents.....                                    | S7  |
| 10. Chemical structures of DPA and carboxylic acids.....                                                | S8  |
| 11. UV-vis titration of <b>1</b> to the addition of DPA.....                                            | S8  |
| 12. UV-vis absorption spectra of the DPA and carboxylic acids.....                                      | S9  |
| 13. The NIR emission lifetimes of <b>1</b> .....                                                        | S9  |
| 14. The visible emission spectrum of DPA.....                                                           | S10 |
| 15. X-Ray Crystallography.....                                                                          | S10 |

## 1. General Procedures

**Photophysical Studies.** Visible and NIR luminescence spectra were recorded on a FLS 980 fluorimeter. The light source for the spectra was a 450 W xenon arc lamp with continuous spectral distribution from 190 to 2600 nm. Liquid nitrogen cooled Ge PIN diode detector was used to detect the NIR emissions from 800 nm to 1700 nm. The quantum yields ( $\Phi_{em}$ ) were obtained by using an integrating sphere, according to eqn  $\Phi_{em} = N_{em} / N_{abs}$ , where  $N_{em}$  and  $N_{abs}$  are the numbers of emitted and absorbed photons, respectively. Systematic errors have been deducted through the standard instrument corrections.

## 2. Synthesis of the ligand H<sub>4</sub>L<sup>1</sup>

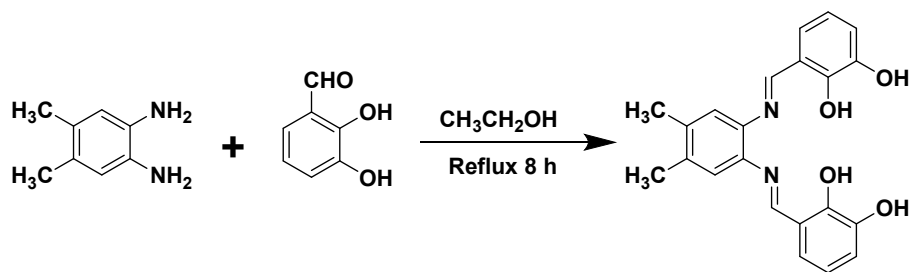

**Scheme S1.** Synthetic approach to H<sub>4</sub>L<sup>1</sup>.

2,3-Dihydroxybenzaldehyde (20 mmol, 2.76 g) was dissolved in 30 mL EtOH, and a solution of 4,5-dimethyl-1,2-phenylenediamine (10 mmol, 1.36 g) in 40 mL EtOH was then added drop by drop. The resulting solution was stirred and heated under reflux for 6 h. It was allowed to cool and was then filtered in vacuum. The solid was washed with EtOH (3 × 5 mL) and then dried under vacuum to give red product. Yield (based on 4,5-Dimethyl-1,2-phenylenediamine): 3.27 g (87%). <sup>1</sup>H NMR ( $\delta_H$ , ppm, 500 MHz, CDCl<sub>3</sub>-d<sub>1</sub>): 13.7(s, 2H), 8.6(s, 2H), 7.0(s, 2H), 7.0(m, 2H) 6.9(m, 2H), 6.8(t, 2H), 2.3(s, 6H). <sup>13</sup>C NMR (125 MHz, CDCl<sub>3</sub>-d<sub>1</sub>,  $\delta$ ): 162.2, 150.1, 145.4, 138.9, 136.8, 112.9, 120.3, 118.8, 118.4, 117.7, 19.6. IR (KBr, cm<sup>-1</sup>): 1614(s), 1539(w), 1461(s), 1420(w), 1353(s), 1281(s), 1214(s), 1158(s), 1017(m), 876(m), 724(s).

### 3. $^1\text{H}$ NMR and $^{13}\text{C}$ NMR spectra of the ligand $\text{H}_4\text{L}^1$

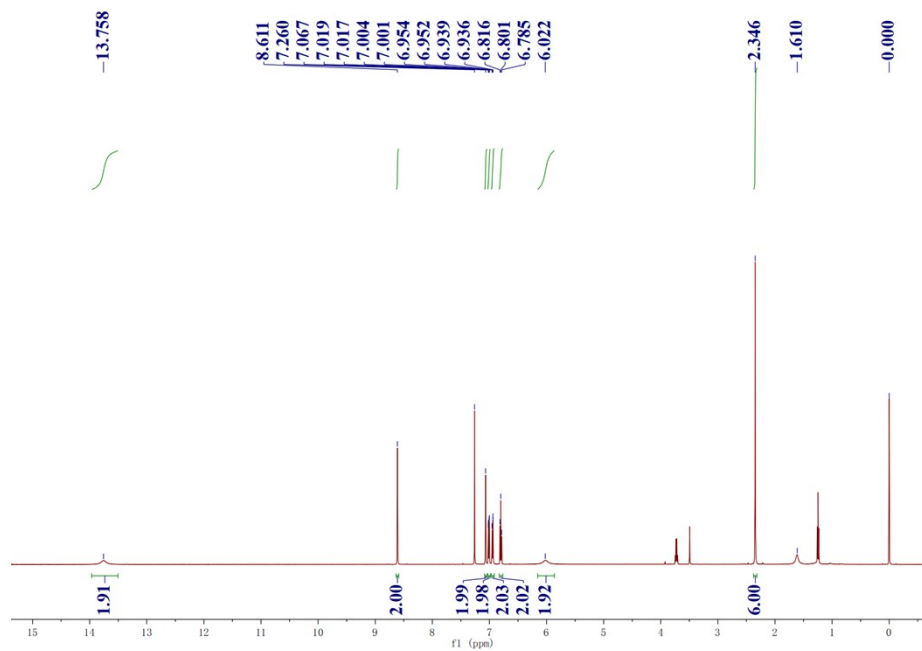

(a)

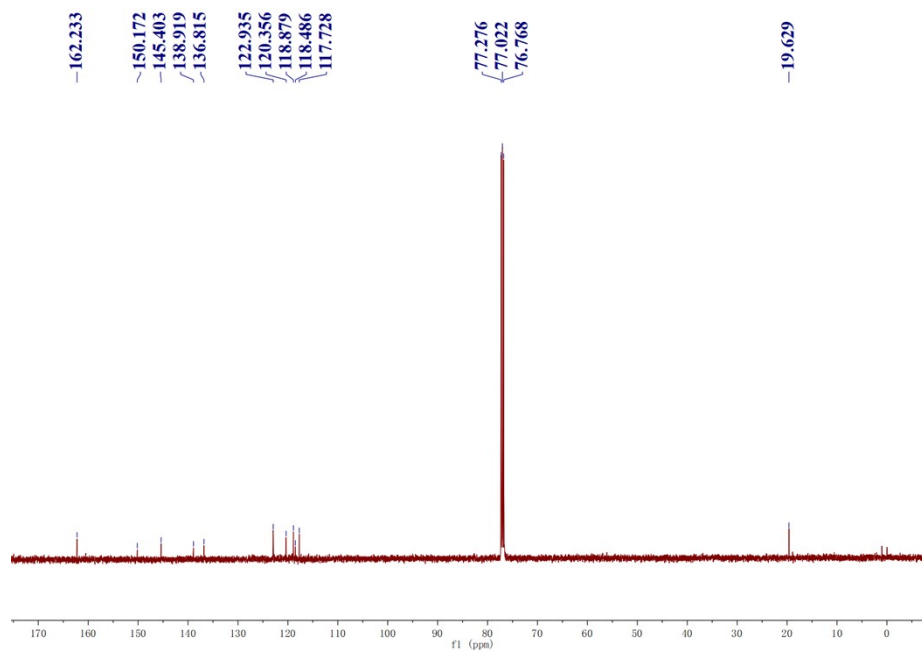

(b)

Figure S1. (a)  $^1\text{H}$  NMR of the ligand  $\text{H}_4\text{L}^1$  in  $\text{CDCl}_3$ ; (b)  $^{13}\text{C}$  NMR of the ligand  $\text{H}_4\text{L}^1$  in  $\text{CDCl}_3$ .

#### 4. IR spectra of the ligand $H_4L^1$ and **1**

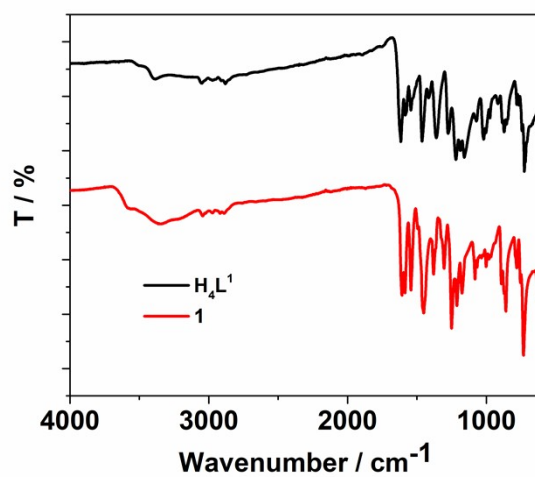

**Figure S2.** IR spectra of the ligand  $H_4L^1$  and **1**.

#### 5. The thermogravimetric analysis of **1**

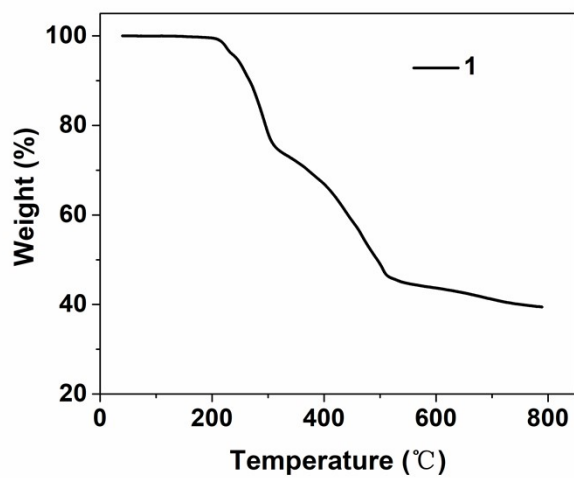

**Figure S3.** The thermogravimetric analysis of **1**.

## 6. Powder XRD pattern of **1**

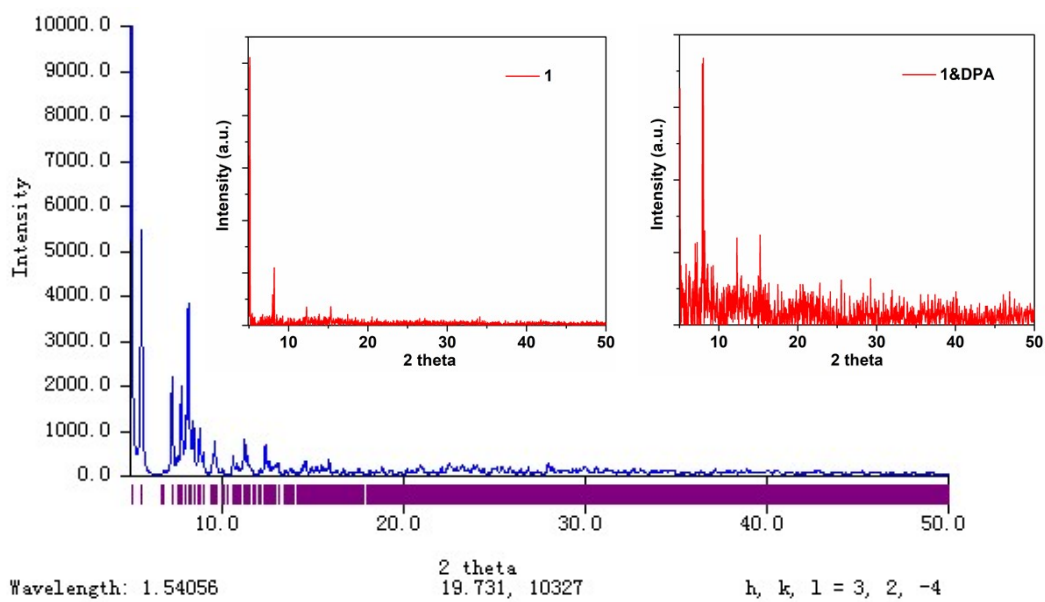

**Figure S4.** Powder XRD pattern of **1** before (left) and after (right) treated with DPA.

## 7. UV-vis absorption spectra of the ligand $H_4L^1$ and **1**

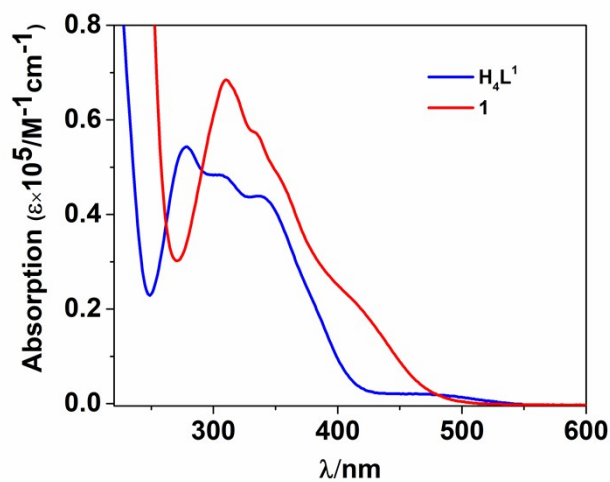

**Figure S5.** UV-vis absorption spectra of the ligand  $H_4L^1$ , **1** and **2** in  $CH_3CN$ .

## 8. The emission spectrum of the Gd(III) analogue at 77 K

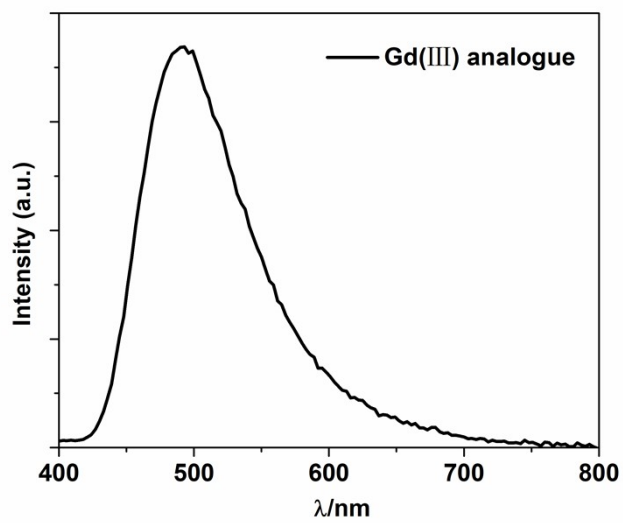

**Figure S6.** The emission spectrum of the Gd(III) analogue ( $10 \mu\text{M}$ ) at 77 K in  $\text{CH}_3\text{CN}$  ( $\lambda_{\text{ex}} = 365 \text{ nm}$ ).

## 9. The fluorescent response of **1** to DPA and interferences

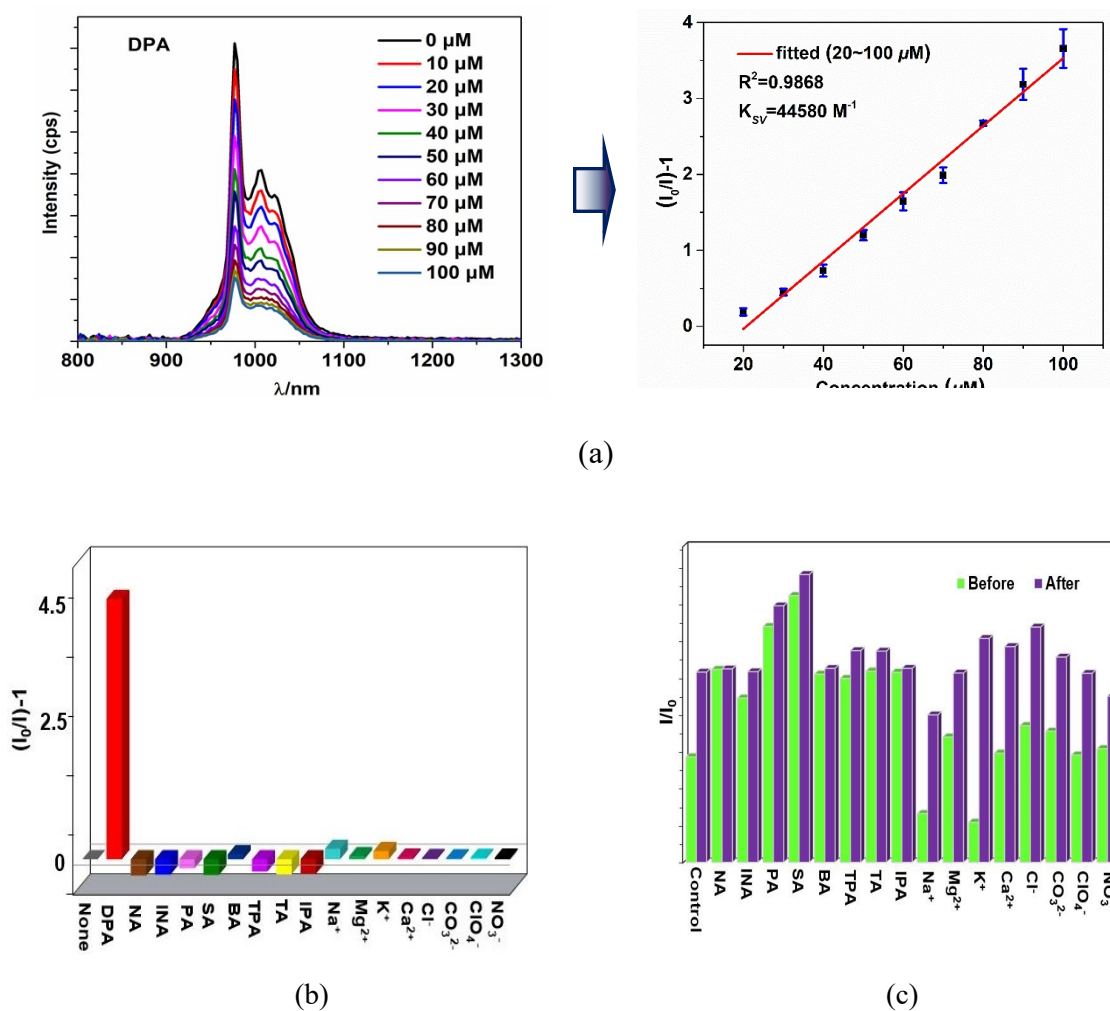

**Figure S7.** (a) NIR luminescent response and  $K_{\text{SV}}$  of **1** (7  $\mu\text{M}$ ) to the addition of DPA with different concentrations in  $\text{CH}_3\text{CN}$  ( $\lambda_{\text{ex}} = 368 \text{ nm}$ ); (b) NIR luminescent response of **1** (7  $\mu\text{M}$ ) to DPA and various carboxylic acids and ions (100  $\mu\text{M}$ ) in  $\text{CH}_3\text{CN}$  ( $\lambda_{\text{ex}} = 368 \text{ nm}$ ). (c) The ligand-centered emission (484 nm) quenching of **1** (7  $\mu\text{M}$ ) before and after the addition of DPA (100  $\mu\text{M}$ ) in the presence of other interferences (100  $\mu\text{M}$ ).

## 10. Chemical structures of DPA and carboxylic acids

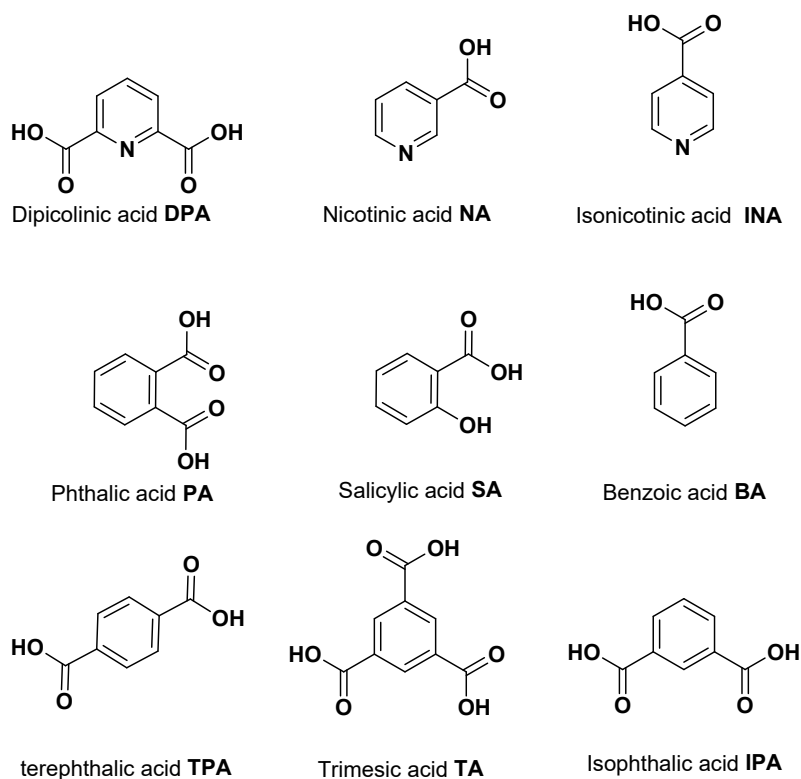

**Scheme S2.** Chemical structures of various carboxylic acids.

## 11. UV-vis absorption spectra of the PDA and carboxylic acids

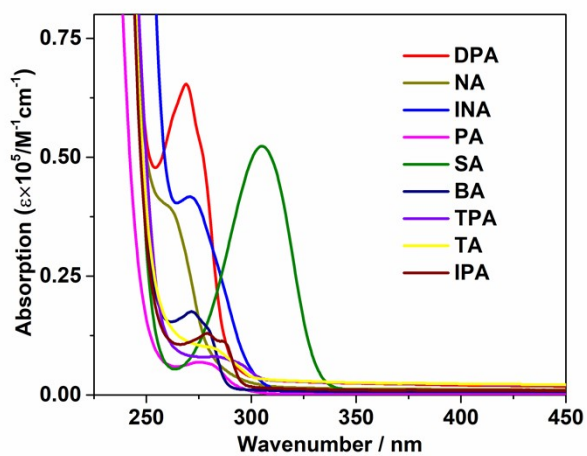

**Figure S8.** UV-vis absorption spectra of the carboxylic acids in CH<sub>3</sub>CN ( $c = 10 \mu\text{M}$ ).



## 12. UV-vis titration of **1** to the addition of DPA

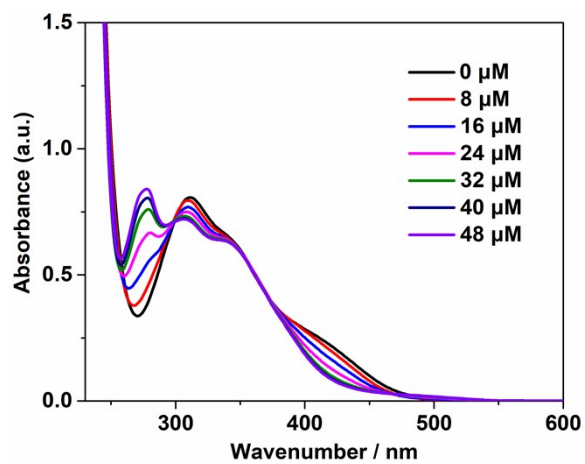

Figure S9. UV-vis titration of **1** (10 μM) with the addition of DPA in CH<sub>3</sub>CN.

## 13. The NIR emission lifetimes of **1**

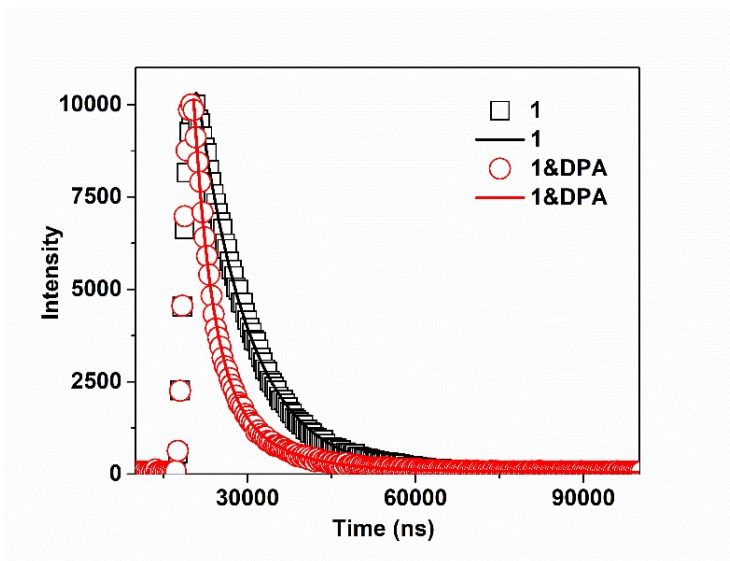

Figure S10. The NIR emission lifetimes of **1** with (red line) and without (black line) the addition of DPA (100 μM) in CH<sub>3</sub>CN

#### 14. The visible emission spectrum of DPA

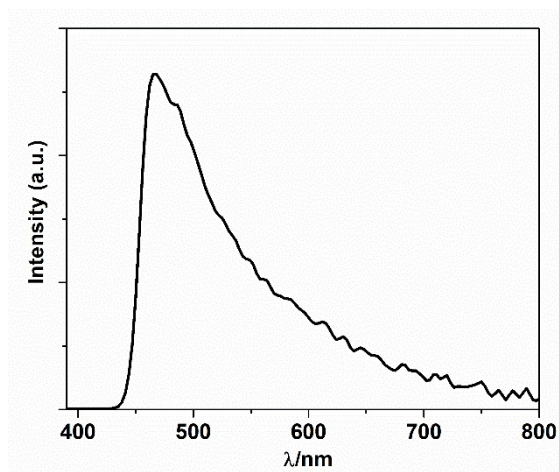

**Figure S11.** The visible emission spectrum of DPA (15  $\mu\text{M}$ ) in  $\text{CH}_3\text{CN}$ . ( $\lambda_{\text{ex}}=368$  nm)

#### 15. X-Ray Crystallography

X-ray data of **1** were collected on a Smart APEX CCD diffractometer in the  $\theta$ - $2\theta$  mode with monochromated Mo  $K\alpha$  radiation at 190 K. The structures were solved by direct method using SHELX 97 program.<sup>1</sup> An empirical absorption correction was applied using SADABS program. The non-hydrogen atoms in the structures were refined anisotropically. All hydrogen atoms were calculated by geometrical methods and refined isotropically. The data can be obtained from [www.ccdc.cam.ac.uk/data\\_request/cif](http://www.ccdc.cam.ac.uk/data_request/cif) (CCDC number: 2022305). The structure refinements of **1** are listed in Table S1, and selected bond lengths and angles are shown in Table S2.

**Ref.** (1) G. H. Sheldrick, SHELX 97, *A software package for the solution and refinement of X-ray data*; University of Göttingen: Göttingen, Germany, **1997**.

**Table S1.** Crystal data and structure refinements for **1**.

|                                                                          | <b>1</b>                                                                            |
|--------------------------------------------------------------------------|-------------------------------------------------------------------------------------|
| Formula                                                                  | C <sub>252</sub> H <sub>278</sub> N <sub>16</sub> O <sub>104</sub> Yb <sub>18</sub> |
| Fw                                                                       | 8309.62                                                                             |
| Crystal system                                                           | Triclinic                                                                           |
| Space group                                                              | P-1                                                                                 |
| <i>a</i> [Å]                                                             | 21.7568(17)                                                                         |
| <i>b</i> [Å]                                                             | 23.689(2)                                                                           |
| <i>c</i> [Å]                                                             | 24.8453(19)                                                                         |
| $\alpha$ [deg]                                                           | 97.103(2)                                                                           |
| $\beta$ [deg]                                                            | 110.9060(10)                                                                        |
| $\gamma$ [deg]                                                           | 114.890(2)                                                                          |
| <i>V</i> [Å <sup>3</sup> ]                                               | 10268.9(14)                                                                         |
| <i>d</i> / [g/cm <sup>3</sup> ]                                          | 1.344                                                                               |
| <i>Z</i>                                                                 | 1                                                                                   |
| <i>T</i> [K]                                                             | 190(1)                                                                              |
| F(000)                                                                   | 3994                                                                                |
| $\mu$ , mm <sup>-1</sup>                                                 | 4.115                                                                               |
| $\theta$ rang, deg                                                       | 1.00-25.00                                                                          |
| reflns meads                                                             | 42386                                                                               |
| reflns used                                                              | 35714                                                                               |
| params                                                                   | 1732                                                                                |
| R1 <sup>a</sup> , wR2 <sup>a</sup> [ <i>I</i> > 2 $\sigma$ ( <i>I</i> )] | 0.0916, 0.1414                                                                      |
| R1, wR2 (all data)                                                       | 0.2042, 0.2303                                                                      |
| Quality of fit                                                           | 1.155                                                                               |

<sup>a</sup> R1 =  $\Sigma|F_o| - |F_c| \Sigma|F_o|$ . wR2 =  $[\Sigma w[(F_o^2 - F_c^2)^2] / \Sigma [w(F_o^2)^2]]^{1/2}$ .  $w = 1 / [\sigma^2(F_o^2) + (0.075P)^2]$ , where  $P = [\max(F_o^2, 0) + 2F_c^2] / 3$ .

**Table S2.** Selected Bond Lengths (Å) and angles (°) for **1**.

|             |           |                   |           |
|-------------|-----------|-------------------|-----------|
| Yb(1)-O(30) | 2.285(17) | Yb(6)-O(40)       | 2.83(2)   |
| Yb(1)-O(25) | 2.360(16) | Yb(7)-O(11)       | 2.404(18) |
| Yb(1)-O(31) | 2.419(18) | Yb(7)-O(10)       | 2.41(2)   |
| Yb(1)-O(13) | 2.426(16) | Yb(7)-O(16)       | 2.456(18) |
| Yb(1)-O(1)  | 2.433(17) | Yb(7)-O(48)       | 2.48(3)   |
| Yb(1)-O(24) | 2.46(2)   | Yb(7)-O(15)       | 2.50(2)   |
| Yb(1)-O(22) | 2.51(2)   | Yb(7)-O(44)       | 2.575(19) |
| Yb(1)-O(23) | 2.59(2)   | Yb(7)-O(45)       | 2.595(19) |
| Yb(2)-O(1)  | 2.328(19) | Yb(7)-N(5)        | 2.72(3)   |
| Yb(2)-O(2)  | 2.426(16) | Yb(7)-N(6)        | 2.77(3)   |
| Yb(2)-O(5)  | 2.448(14) | Yb(8)-O(15)#1     | 2.380(19) |
| Yb(2)-O(31) | 2.483(15) | Yb(8)-O(17)       | 2.410(19) |
| Yb(2)-O(26) | 2.52(2)   | Yb(8)-O(11)#1     | 2.466(19) |
| Yb(2)-O(32) | 2.545(18) | Yb(8)-O(47)       | 2.471(17) |
| Yb(2)-O(28) | 2.570(19) | Yb(8)-O(14)       | 2.502(17) |
| Yb(2)-O(27) | 2.58(2)   | Yb(8)-O(12)       | 2.55(2)   |
| Yb(2)-O(25) | 2.600(18) | Yb(8)-N(8)        | 2.60(2)   |
| Yb(3)-O(5)  | 2.407(15) | Yb(8)-N(7)        | 2.63(3)   |
| Yb(3)-O(3)  | 2.423(17) | Yb(8)-O(18)       | 2.63(2)   |
| Yb(3)-O(2)  | 2.46(2)   | Yb(9)-O(14)       | 2.350(18) |
| Yb(3)-O(46) | 2.495(17) | Yb(9)-O(13)       | 2.352(16) |
| Yb(3)-O(32) | 2.576(18) | Yb(9)-O(17)       | 2.394(18) |
| Yb(3)-O(34) | 2.59(2)   | Yb(9)-O(21)       | 2.455(19) |
| Yb(3)-O(6)  | 2.629(17) | Yb(9)-O(23)       | 2.519(19) |
| Yb(3)-N(1)  | 2.64(2)   | Yb(9)-O(19)       | 2.529(19) |
| Yb(3)-N(2)  | 2.67(2)   | Yb(9)-O(47)       | 2.561(17) |
| Yb(4)-O(6)  | 2.375(16) | Yb(9)-O(20)       | 2.56(2)   |
| Yb(4)-O(4)  | 2.393(16) | Yb(9)-O(22)       | 2.72(2)   |
| Yb(4)-O(36) | 2.440(19) | O(30)-Yb(1)-O(25) | 132.4(7)  |
| Yb(4)-O(7)  | 2.488(16) | O(30)-Yb(1)-O(31) | 67.0(6)   |
| Yb(4)-O(3)  | 2.488(15) | O(25)-Yb(1)-O(31) | 73.4(6)   |
| Yb(4)-O(35) | 2.51(2)   | O(30)-Yb(1)-O(13) | 84.5(6)   |
| Yb(4)-N(3)  | 2.65(3)   | O(25)-Yb(1)-O(13) | 82.2(6)   |
| Yb(4)-O(33) | 2.687(17) | O(31)-Yb(1)-O(13) | 106.3(5)  |
| Yb(4)-N(4)  | 2.75(2)   | O(30)-Yb(1)-O(1)  | 117.3(7)  |
| Yb(5)-O(8)  | 2.415(18) | O(25)-Yb(1)-O(1)  | 66.8(6)   |
| Yb(5)-O(7)  | 2.418(19) | O(31)-Yb(1)-O(1)  | 67.4(6)   |
| Yb(5)-O(4)  | 2.435(14) | O(13)-Yb(1)-O(1)  | 148.9(6)  |
| Yb(5)-O(9)  | 2.474(18) | O(30)-Yb(1)-O(24) | 81.3(7)   |
| Yb(5)-O(33) | 2.498(17) | O(25)-Yb(1)-O(24) | 144.5(6)  |
| Yb(5)-O(39) | 2.52(2)   | O(31)-Yb(1)-O(24) | 122.6(6)  |
| Yb(5)-O(37) | 2.59(3)   | O(13)-Yb(1)-O(24) | 117.2(7)  |
| Yb(5)-O(38) | 2.579(19) | O(1)-Yb(1)-O(24)  | 89.3(7)   |
| Yb(5)-O(40) | 2.64(2)   | O(30)-Yb(1)-O(22) | 138.9(7)  |
| Yb(6)-O(43) | 2.39(2)   | O(25)-Yb(1)-O(22) | 79.0(7)   |
| Yb(6)-O(38) | 2.42(2)   | O(31)-Yb(1)-O(22) | 152.1(6)  |
| Yb(6)-O(9)  | 2.429(18) | O(13)-Yb(1)-O(22) | 73.4(6)   |
| Yb(6)-O(10) | 2.44(2)   | O(1)-Yb(1)-O(22)  | 98.1(7)   |
| Yb(6)-O(16) | 2.44(2)   | O(24)-Yb(1)-O(22) | 78.9(7)   |
| Yb(6)-O(42) | 2.50(2)   | O(30)-Yb(1)-O(23) | 72.2(7)   |
| Yb(6)-O(45) | 2.549(16) | O(25)-Yb(1)-O(23) | 138.4(6)  |
| Yb(6)-O(41) | 2.59(3)   | O(31)-Yb(1)-O(23) | 139.0(5)  |

|                   |          |                   |          |
|-------------------|----------|-------------------|----------|
| O(13)-Yb(1)-O(23) | 65.6(6)  | O(32)-Yb(3)-O(34) | 74.1(6)  |
| O(1)-Yb(1)-O(23)  | 139.5(6) | O(5)-Yb(3)-O(6)   | 65.1(5)  |
| O(24)-Yb(1)-O(23) | 51.7(7)  | O(3)-Yb(3)-O(6)   | 62.4(5)  |
| O(22)-Yb(1)-O(23) | 67.3(7)  | O(2)-Yb(3)-O(6)   | 122.3(5) |
| O(1)-Yb(2)-O(2)   | 65.2(6)  | O(46)-Yb(3)-O(6)  | 74.1(6)  |
| O(1)-Yb(2)-O(5)   | 128.8(6) | O(32)-Yb(3)-O(6)  | 72.0(5)  |
| O(2)-Yb(2)-O(5)   | 64.5(6)  | O(34)-Yb(3)-O(6)  | 126.1(6) |
| O(1)-Yb(2)-O(31)  | 68.0(6)  | O(5)-Yb(3)-N(1)   | 103.4(6) |
| O(2)-Yb(2)-O(31)  | 125.7(5) | O(3)-Yb(3)-N(1)   | 127.2(6) |
| O(5)-Yb(2)-O(31)  | 158.0(5) | O(2)-Yb(3)-N(1)   | 68.4(6)  |
| O(1)-Yb(2)-O(26)  | 86.0(7)  | O(46)-Yb(3)-N(1)  | 76.8(6)  |
| O(2)-Yb(2)-O(26)  | 85.3(7)  | O(32)-Yb(3)-N(1)  | 131.9(6) |
| O(5)-Yb(2)-O(26)  | 81.0(6)  | O(34)-Yb(3)-N(1)  | 81.3(6)  |
| O(31)-Yb(2)-O(26) | 117.2(6) | O(6)-Yb(3)-N(1)   | 150.8(6) |
| O(1)-Yb(2)-O(32)  | 98.2(6)  | O(5)-Yb(3)-N(2)   | 141.2(6) |
| O(2)-Yb(2)-O(32)  | 67.4(6)  | O(3)-Yb(3)-N(2)   | 69.6(6)  |
| O(5)-Yb(2)-O(32)  | 70.8(5)  | O(2)-Yb(3)-N(2)   | 126.1(7) |
| O(31)-Yb(2)-O(32) | 94.3(5)  | O(46)-Yb(3)-N(2)  | 69.7(7)  |
| O(26)-Yb(2)-O(32) | 147.0(7) | O(32)-Yb(3)-N(2)  | 147.1(7) |
| O(1)-Yb(2)-O(28)  | 146.5(6) | O(34)-Yb(3)-N(2)  | 79.2(7)  |
| O(2)-Yb(2)-O(28)  | 128.6(6) | O(6)-Yb(3)-N(2)   | 110.7(6) |
| O(5)-Yb(2)-O(28)  | 77.4(5)  | N(1)-Yb(3)-N(2)   | 60.3(7)  |
| O(31)-Yb(2)-O(28) | 82.1(6)  | O(6)-Yb(4)-O(4)   | 130.0(5) |
| O(26)-Yb(2)-O(28) | 122.4(7) | O(6)-Yb(4)-O(36)  | 95.9(6)  |
| O(32)-Yb(2)-O(28) | 68.4(6)  | O(4)-Yb(4)-O(36)  | 73.9(6)  |
| O(1)-Yb(2)-O(27)  | 134.8(6) | O(6)-Yb(4)-O(7)   | 150.4(6) |
| O(2)-Yb(2)-O(27)  | 150.4(6) | O(4)-Yb(4)-O(7)   | 64.3(5)  |
| O(5)-Yb(2)-O(27)  | 89.5(6)  | O(36)-Yb(4)-O(7)  | 113.7(7) |
| O(31)-Yb(2)-O(27) | 83.6(6)  | O(6)-Yb(4)-O(3)   | 65.3(6)  |
| O(26)-Yb(2)-O(27) | 76.4(7)  | O(4)-Yb(4)-O(3)   | 64.8(5)  |
| O(32)-Yb(2)-O(27) | 119.0(6) | O(36)-Yb(4)-O(3)  | 75.2(6)  |
| O(28)-Yb(2)-O(27) | 50.9(6)  | O(7)-Yb(4)-O(3)   | 122.4(6) |
| O(1)-Yb(2)-O(25)  | 64.5(6)  | O(6)-Yb(4)-O(35)  | 78.1(6)  |
| O(2)-Yb(2)-O(25)  | 111.9(6) | O(4)-Yb(4)-O(35)  | 137.1(6) |
| O(5)-Yb(2)-O(25)  | 129.2(5) | O(36)-Yb(4)-O(35) | 142.9(7) |
| O(31)-Yb(2)-O(25) | 68.3(5)  | O(7)-Yb(4)-O(35)  | 77.1(6)  |
| O(26)-Yb(2)-O(25) | 49.0(6)  | O(3)-Yb(4)-O(35)  | 130.9(7) |
| O(32)-Yb(2)-O(25) | 158.7(6) | O(6)-Yb(4)-N(3)   | 66.9(8)  |
| O(28)-Yb(2)-O(25) | 118.8(6) | O(4)-Yb(4)-N(3)   | 138.4(8) |
| O(27)-Yb(2)-O(25) | 72.8(6)  | O(36)-Yb(4)-N(3)  | 66.0(8)  |
| O(5)-Yb(3)-O(3)   | 126.7(5) | O(7)-Yb(4)-N(3)   | 122.7(8) |
| O(5)-Yb(3)-O(2)   | 64.6(5)  | O(3)-Yb(4)-N(3)   | 112.9(7) |
| O(3)-Yb(3)-O(2)   | 144.0(5) | O(35)-Yb(4)-N(3)  | 78.2(8)  |
| O(5)-Yb(3)-O(46)  | 72.3(6)  | O(6)-Yb(4)-O(33)  | 95.8(5)  |
| O(3)-Yb(3)-O(46)  | 101.4(6) | O(4)-Yb(4)-O(33)  | 69.2(5)  |
| O(2)-Yb(3)-O(46)  | 114.3(6) | O(36)-Yb(4)-O(33) | 139.8(6) |
| O(5)-Yb(3)-O(32)  | 70.9(5)  | O(7)-Yb(4)-O(33)  | 62.9(5)  |
| O(3)-Yb(3)-O(32)  | 84.5(5)  | O(3)-Yb(4)-O(33)  | 75.3(4)  |
| O(2)-Yb(3)-O(32)  | 66.4(5)  | O(35)-Yb(4)-O(33) | 77.3(6)  |
| O(46)-Yb(3)-O(32) | 137.7(6) | N(3)-Yb(4)-O(33)  | 152.5(8) |
| O(5)-Yb(3)-O(34)  | 136.3(6) | O(6)-Yb(4)-N(4)   | 122.7(7) |
| O(3)-Yb(3)-O(34)  | 73.8(6)  | O(4)-Yb(4)-N(4)   | 102.6(7) |
| O(2)-Yb(3)-O(34)  | 77.9(6)  | O(36)-Yb(4)-N(4)  | 76.5(7)  |
| O(46)-Yb(3)-O(34) | 148.0(6) | O(7)-Yb(4)-N(4)   | 66.1(6)  |

|                   |          |                   |          |
|-------------------|----------|-------------------|----------|
| O(3)-Yb(4)-N(4)   | 151.2(6) | O(16)-Yb(6)-O(42) | 73.8(7)  |
| O(35)-Yb(4)-N(4)  | 76.5(8)  | O(43)-Yb(6)-O(45) | 143.8(8) |
| N(3)-Yb(4)-N(4)   | 58.2(8)  | O(38)-Yb(6)-O(45) | 84.5(6)  |
| O(33)-Yb(4)-N(4)  | 126.4(5) | O(9)-Yb(6)-O(45)  | 95.8(6)  |
| O(8)-Yb(5)-O(7)   | 63.0(5)  | O(10)-Yb(6)-O(45) | 67.6(7)  |
| O(8)-Yb(5)-O(4)   | 127.8(5) | O(16)-Yb(6)-O(45) | 69.9(6)  |
| O(7)-Yb(5)-O(4)   | 64.8(5)  | O(42)-Yb(6)-O(45) | 70.4(7)  |
| O(8)-Yb(5)-O(9)   | 93.9(6)  | O(43)-Yb(6)-O(41) | 72.8(9)  |
| O(7)-Yb(5)-O(9)   | 88.5(6)  | O(38)-Yb(6)-O(41) | 93.1(8)  |
| O(4)-Yb(5)-O(9)   | 85.3(6)  | O(9)-Yb(6)-O(41)  | 138.7(7) |
| O(8)-Yb(5)-O(33)  | 87.4(5)  | O(10)-Yb(6)-O(41) | 143.3(8) |
| O(7)-Yb(5)-O(33)  | 66.8(6)  | O(16)-Yb(6)-O(41) | 84.6(7)  |
| O(4)-Yb(5)-O(33)  | 71.8(5)  | O(42)-Yb(6)-O(41) | 51.3(8)  |
| O(9)-Yb(5)-O(33)  | 151.6(6) | O(45)-Yb(6)-O(41) | 121.0(7) |
| O(8)-Yb(5)-O(39)  | 141.0(6) | O(43)-Yb(6)-O(40) | 68.3(8)  |
| O(7)-Yb(5)-O(39)  | 130.6(6) | O(38)-Yb(6)-O(40) | 62.2(6)  |
| O(4)-Yb(5)-O(39)  | 77.5(6)  | O(9)-Yb(6)-O(40)  | 68.4(6)  |
| O(9)-Yb(5)-O(39)  | 119.9(6) | O(10)-Yb(6)-O(40) | 124.6(6) |
| O(33)-Yb(5)-O(39) | 72.1(6)  | O(16)-Yb(6)-O(40) | 143.5(6) |
| O(8)-Yb(5)-O(37)  | 75.5(6)  | O(42)-Yb(6)-O(40) | 107.2(7) |
| O(7)-Yb(5)-O(37)  | 132.8(6) | O(45)-Yb(6)-O(40) | 146.1(6) |
| O(4)-Yb(5)-O(37)  | 148.5(6) | O(41)-Yb(6)-O(40) | 70.4(7)  |
| O(9)-Yb(5)-O(37)  | 117.0(6) | O(11)-Yb(7)-O(10) | 146.4(7) |
| O(33)-Yb(5)-O(37) | 90.8(6)  | O(11)-Yb(7)-O(16) | 127.3(6) |
| O(39)-Yb(5)-O(37) | 72.1(7)  | O(10)-Yb(7)-O(16) | 64.6(7)  |
| O(8)-Yb(5)-O(38)  | 79.6(6)  | O(11)-Yb(7)-O(48) | 104.8(8) |
| O(7)-Yb(5)-O(38)  | 134.0(6) | O(10)-Yb(7)-O(48) | 108.8(8) |
| O(4)-Yb(5)-O(38)  | 143.6(6) | O(16)-Yb(7)-O(48) | 74.2(8)  |
| O(9)-Yb(5)-O(38)  | 67.4(6)  | O(11)-Yb(7)-O(15) | 64.0(6)  |
| O(33)-Yb(5)-O(38) | 140.2(6) | O(10)-Yb(7)-O(15) | 124.6(7) |
| O(39)-Yb(5)-O(38) | 95.2(6)  | O(16)-Yb(7)-O(15) | 64.7(6)  |
| O(37)-Yb(5)-O(38) | 49.6(6)  | O(48)-Yb(7)-O(15) | 76.9(8)  |
| O(8)-Yb(5)-O(40)  | 142.7(6) | O(11)-Yb(7)-O(44) | 72.0(6)  |
| O(7)-Yb(5)-O(40)  | 145.9(7) | O(10)-Yb(7)-O(44) | 79.9(6)  |
| O(4)-Yb(5)-O(40)  | 86.0(6)  | O(16)-Yb(7)-O(44) | 135.9(7) |
| O(9)-Yb(5)-O(40)  | 71.1(7)  | O(48)-Yb(7)-O(44) | 145.5(8) |
| O(33)-Yb(5)-O(40) | 122.1(6) | O(15)-Yb(7)-O(44) | 126.5(6) |
| O(39)-Yb(5)-O(40) | 50.8(7)  | O(11)-Yb(7)-O(45) | 87.1(6)  |
| O(37)-Yb(5)-O(40) | 81.3(7)  | O(10)-Yb(7)-O(45) | 67.3(6)  |
| O(38)-Yb(5)-O(40) | 63.2(6)  | O(16)-Yb(7)-O(45) | 69.0(6)  |
| O(43)-Yb(6)-O(38) | 130.4(7) | O(48)-Yb(7)-O(45) | 140.6(7) |
| O(43)-Yb(6)-O(9)  | 88.9(7)  | O(15)-Yb(7)-O(45) | 75.1(6)  |
| O(38)-Yb(6)-O(9)  | 70.7(7)  | O(44)-Yb(7)-O(45) | 73.9(6)  |
| O(43)-Yb(6)-O(10) | 82.4(8)  | O(11)-Yb(7)-N(5)  | 126.6(8) |
| O(38)-Yb(6)-O(10) | 123.6(7) | O(10)-Yb(7)-N(5)  | 66.9(8)  |
| O(9)-Yb(6)-O(10)  | 65.0(6)  | O(16)-Yb(7)-N(5)  | 102.9(8) |
| O(43)-Yb(6)-O(16) | 79.3(7)  | O(48)-Yb(7)-N(5)  | 69.4(9)  |
| O(38)-Yb(6)-O(16) | 148.1(6) | O(15)-Yb(7)-N(5)  | 146.2(8) |
| O(9)-Yb(6)-O(16)  | 128.9(6) | O(44)-Yb(7)-N(5)  | 84.9(8)  |
| O(10)-Yb(6)-O(16) | 64.2(6)  | O(45)-Yb(7)-N(5)  | 132.1(7) |
| O(43)-Yb(6)-O(42) | 119.0(8) | O(11)-Yb(7)-N(6)  | 68.1(7)  |
| O(38)-Yb(6)-O(42) | 79.9(7)  | O(10)-Yb(7)-N(6)  | 123.1(7) |
| O(9)-Yb(6)-O(42)  | 148.8(7) | O(16)-Yb(7)-N(6)  | 144.5(7) |
| O(10)-Yb(6)-O(42) | 128.2(7) | O(48)-Yb(7)-N(6)  | 70.6(9)  |

|                       |          |                   |          |
|-----------------------|----------|-------------------|----------|
| O(15)-Yb(7)-N(6)      | 110.9(7) | N(8)-Yb(8)-O(18)  | 79.9(7)  |
| O(44)-Yb(7)-N(6)      | 76.8(7)  | N(7)-Yb(8)-O(18)  | 68.1(8)  |
| O(45)-Yb(7)-N(6)      | 146.2(7) | O(14)-Yb(9)-O(13) | 66.2(6)  |
| N(5)-Yb(7)-N(6)       | 59.9(8)  | O(14)-Yb(9)-O(17) | 65.0(7)  |
| O(15)#1-Yb(8)-O(17)   | 129.8(7) | O(13)-Yb(9)-O(17) | 131.0(6) |
| O(15)#1-Yb(8)-O(11)#1 | 64.9(7)  | O(14)-Yb(9)-O(21) | 84.5(6)  |
| O(17)-Yb(8)-O(11)#1   | 65.6(6)  | O(13)-Yb(9)-O(21) | 96.3(6)  |
| O(15)#1-Yb(8)-O(47)   | 88.7(6)  | O(17)-Yb(9)-O(21) | 83.8(7)  |
| O(17)-Yb(8)-O(47)     | 70.7(6)  | O(14)-Yb(9)-O(23) | 132.7(7) |
| O(11)#1-Yb(8)-O(47)   | 74.0(6)  | O(13)-Yb(9)-O(23) | 67.9(6)  |
| O(15)#1-Yb(8)-O(14)   | 146.9(6) | O(17)-Yb(9)-O(23) | 156.1(6) |
| O(17)-Yb(8)-O(14)     | 62.5(6)  | O(21)-Yb(9)-O(23) | 111.1(7) |
| O(11)#1-Yb(8)-O(14)   | 121.6(6) | O(14)-Yb(9)-O(19) | 130.2(6) |
| O(47)-Yb(8)-O(14)     | 65.4(6)  | O(13)-Yb(9)-O(19) | 134.7(6) |
| O(15)#1-Yb(8)-O(12)   | 73.8(7)  | O(17)-Yb(9)-O(19) | 77.7(7)  |
| O(17)-Yb(8)-O(12)     | 137.4(7) | O(21)-Yb(9)-O(19) | 124.3(7) |
| O(11)#1-Yb(8)-O(12)   | 128.7(6) | O(23)-Yb(9)-O(19) | 78.4(7)  |
| O(47)-Yb(8)-O(12)     | 76.0(7)  | O(14)-Yb(9)-O(47) | 66.2(5)  |
| O(14)-Yb(8)-O(12)     | 79.9(6)  | O(13)-Yb(9)-O(47) | 86.9(5)  |
| O(15)#1-Yb(8)-N(8)    | 123.0(7) | O(17)-Yb(9)-O(47) | 69.5(6)  |
| O(17)-Yb(8)-N(8)      | 104.7(7) | O(21)-Yb(9)-O(47) | 146.4(7) |
| O(11)#1-Yb(8)-N(8)    | 152.5(6) | O(23)-Yb(9)-O(47) | 101.1(6) |
| O(47)-Yb(8)-N(8)      | 129.0(6) | O(19)-Yb(9)-O(47) | 70.5(6)  |
| O(14)-Yb(8)-N(8)      | 68.1(6)  | O(14)-Yb(9)-O(20) | 148.9(7) |
| O(12)-Yb(8)-N(8)      | 76.5(7)  | O(13)-Yb(9)-O(20) | 139.8(6) |
| O(15)#1-Yb(8)-N(7)    | 69.2(8)  | O(17)-Yb(9)-O(20) | 88.2(7)  |
| O(17)-Yb(8)-N(7)      | 138.5(7) | O(21)-Yb(9)-O(20) | 76.8(7)  |
| O(11)#1-Yb(8)-N(7)    | 111.0(8) | O(23)-Yb(9)-O(20) | 77.8(7)  |
| O(47)-Yb(8)-N(7)      | 150.5(7) | O(19)-Yb(9)-O(20) | 50.9(6)  |
| O(14)-Yb(8)-N(7)      | 125.1(8) | O(47)-Yb(9)-O(20) | 120.7(6) |
| O(12)-Yb(8)-N(7)      | 79.1(8)  | O(14)-Yb(9)-O(22) | 108.2(6) |
| N(8)-Yb(8)-N(7)       | 57.9(8)  | O(13)-Yb(9)-O(22) | 70.7(6)  |
| O(15)#1-Yb(8)-O(18)   | 100.0(7) | O(17)-Yb(9)-O(22) | 130.4(6) |
| O(17)-Yb(8)-O(18)     | 72.0(6)  | O(21)-Yb(9)-O(22) | 47.0(7)  |
| O(11)#1-Yb(8)-O(18)   | 72.6(7)  | O(23)-Yb(9)-O(22) | 65.2(6)  |
| O(47)-Yb(8)-O(18)     | 137.6(7) | O(19)-Yb(9)-O(22) | 121.2(7) |
| O(14)-Yb(8)-O(18)     | 112.9(7) | O(47)-Yb(9)-O(22) | 156.7(6) |
| O(12)-Yb(8)-O(18)     | 146.3(7) | O(20)-Yb(9)-O(22) | 76.5(6)  |

---
